# Supplementary material
Source: PubMed Central journal article supplement (PMC5136454)
Supplement: NIHMS801836-supplement-2.pdf [file NIHMS801836-supplement-2.pdf]

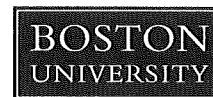

**Boston University**

Metcalf Center for Science & Engineering  
590 Commonwealth Ave  
Boston, MA 02215

**Mark W. Grinstaff**

Distinguished Professor of Translational Research • Professor of Biomedical Engineering • Professor of Chemistry • Professor of Materials Science and Engineering • Professor of Medicine  
Director, Translational Research in Biomaterials Training Program  
Director, Center for Nanoscience and Nanobiotechnology  
T 617.358.3429 • F 617.353.6466 • mgrin@bu.edu

April 7, 2016

Kam W. Leong, Ph.D.—Editor-in-Chief, *Biomaterials*

Department of Biomedical Engineering  
Columbia University  
351 Engineering Terrace  
1210 Amsterdam Avenue, Mail Code: 8904  
New York, NY 10027  
Email: kwl2121@columbia.edu

Dear Professor Leong,

We the undersigned declare that this manuscript is original, has not been published before and is not currently being considered for publication elsewhere.

The authors do not have a conflict of interest.

We confirm that the manuscript has been read and approved by all named authors and that there are no other persons who satisfied the criteria for authorship but are not listed. We further confirm that the order of authors listed in the manuscript has been approved by all of us.

We confirm that we have given due consideration to the protection of intellectual property associated with this work and that there are no impediments to publication, including the timing of publication, with respect to intellectual property. In so doing we confirm that we have followed the regulations of our institutions concerning intellectual property.

We further confirm that any aspect of the work covered in this manuscript that has involved either experimental animals or human patients has been conducted with the ethical approval of all relevant bodies and that such approvals are acknowledged within the manuscript.

We understand that the Corresponding Author is the sole contact for the Editorial process (including Editorial Manager and direct communications with the office). He/she is responsible for communicating with the other authors about progress, submissions of revisions and final approval of proofs. We confirm that we have provided a current, correct email address which is accessible by the Corresponding Author and which has been configured to accept email from [biomaterials@elsevier.com](mailto:biomaterials@elsevier.com).

Sincerely

Eric Falde ([eric.falde@gmail.com](mailto:eric.falde@gmail.com)), Stefan Yohe ([stefanyohe@gmail.com](mailto:stefanyohe@gmail.com)), Yolonda L. Colson ([ycolson@partners.org](mailto:ycolson@partners.org)) and Mark W. Grinstaff ([mgrin@bu.edu](mailto:mgrin@bu.edu)),

Yolonda L Colson

Mark Henstaff

Eric Falck

Stephano John
